# Supplementary material for: Establishment and Validation of an Individualized Cell Cycle Process-Related Gene Signature to Predict Cancer-Specific Survival in Patients with Bladder Cancer
Source: PubMed Central journal article supplement (PMC7281226; doi:10.3390/cancers12051146), 2020-05-02
Supplement: cancers-12-01146-s001.pdf [file cancers-12-01146-s001.pdf]

# Supplementary Materials: Establishment and Validation of an Individualized Cell Cycle Process-Related Gene Signature to Predict Cancer-Specific Survival in Patients with Bladder Cancer

Run Shi, Xuanwen Bao, Paul Rogowski, Christian Schäfer, Nina-Sophie Schmidt-Hegemann, Kristian Unger, Shun Lu, Jing Sun, Alexander Buchner, Christian Stief, Claus Belka and Minglun Li

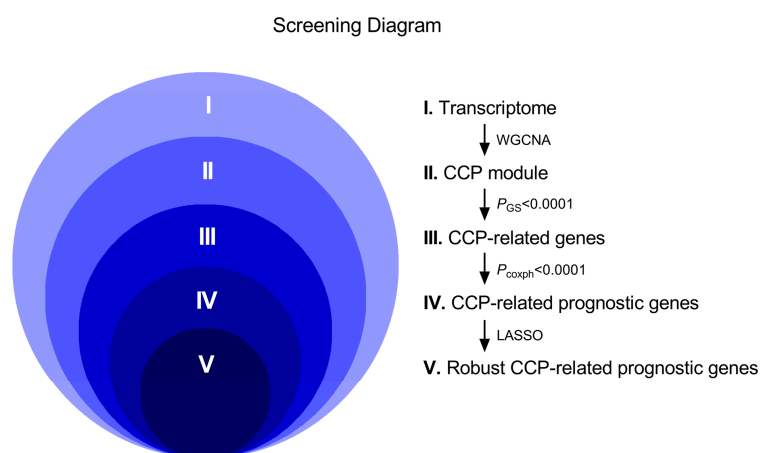

Figure S1. A detailed screening diagram to establish a robust gene signature for CSS.

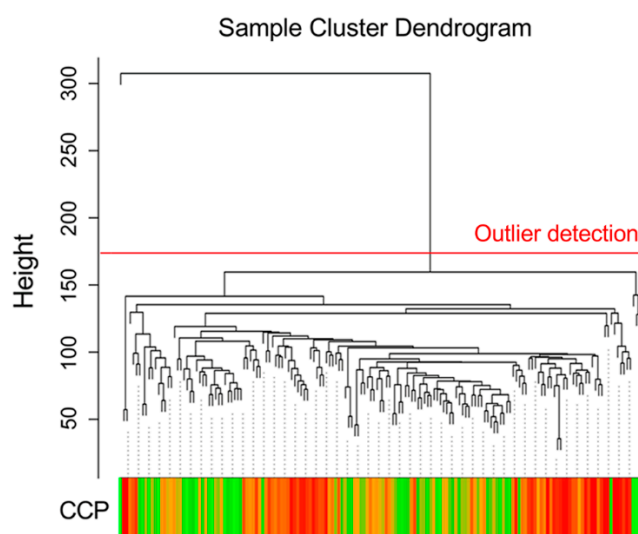

Figure S2. Sample clustering showed one outlier was detected and excluded in WGCNA.

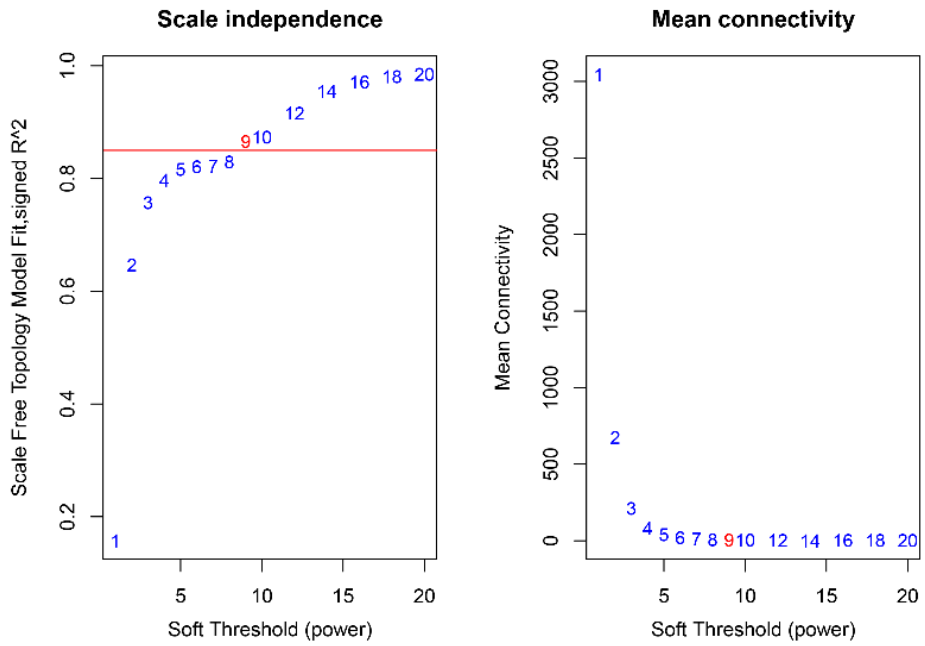

**Figure S3.** A power of  $\beta = 9$  was chosen as the optimal soft threshold to ensure a scale-free co-expression network.

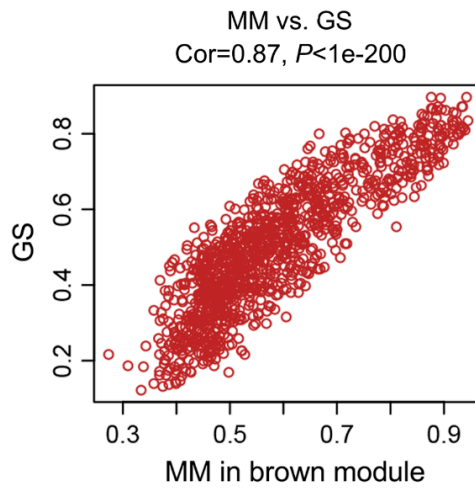

**Figure S4.** Scatter diagram showed a highly positive correlation between GS and MM in the brown module ( $r = 0.87, p < 1 \times 10^{-200}$ ).

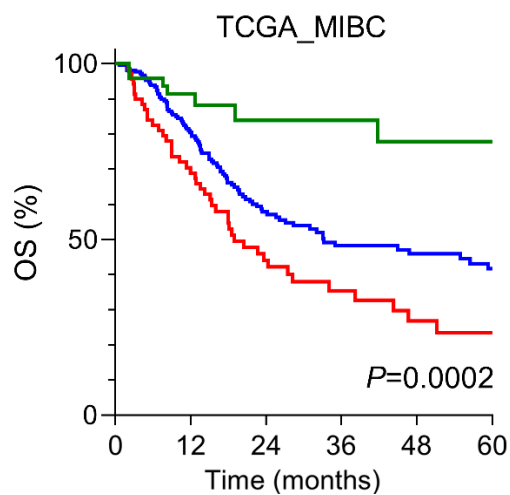

**Figure S5.** Significant difference of overall survival in TCGA MIBC patients ( $P=0.0002$ ) was observed among different risk subgroups defined by the decision tree.

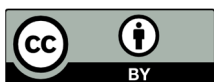

© 2020 by the authors. Licensee MDPI, Basel, Switzerland. This article is an open access article distributed under the terms and conditions of the Creative Commons Attribution (CC BY) license (<http://creativecommons.org/licenses/by/4.0/>).
